# Supplementary material for: Spatial Analysis of Groundwater Hydrochemistry through Integrated Multivariate Analysis: A Case Study in the Urbanized Langat Basin, Malaysia
Source: MDPI journal article supplement (doi:10.3390/ijerph18115733), 2021-05-27
Supplement: s1 [file s1]

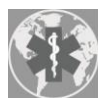

**Table S1.** Descriptive analysis for in-situ parameters.

| Stations |      | pH   | Temperature<br>(°C) | Salinity<br>(ppt) | EC<br>μS/cm | DO<br>(mg/L) | TDS<br>(mg/L) |
|----------|------|------|---------------------|-------------------|-------------|--------------|---------------|
| LW1      | Mean | 5.82 | 28.70               | 0.06              | 146.43      | 1.06         | 88.40         |
|          | SD   | 0.01 | 0.00                | 0.00              | 2.46        | 0.14         | 1.95          |
| LW2      | Mean | 5.14 | 31.03               | 0.04              | 108.40      | 0.70         | 63.05         |
|          | SD   | 0.01 | 0.06                | 0.00              | 0.00        | 0.08         | 0.00          |
| LW3      | Mean | 7.35 | 30.50               | 0.16              | 372.67      | 1.35         | 219.05        |
|          | SD   | 0.05 | 0.00                | 0.00              | 0.06        | 0.04         | 0.00          |
| LW4      | Mean | 6.03 | 28.67               | 0.06              | 135.57      | 1.33         | 82.55         |
|          | SD   | 0.00 | 0.06                | 0.00              | 0.49        | 0.01         | 0.00          |
| LW5      | Mean | 4.61 | 29.40               | 0.01              | 36.10       | 1.67         | 21.45         |
|          | SD   | 0.01 | 0.00                | 0.00              | 0.00        | 0.06         | 0.00          |
| LW6      | Mean | 6.12 | 28.10               | 0.08              | 186.20      | 1.21         | 114.40        |
|          | SD   | 0.02 | 0.00                | 0.00              | 0.61        | 0.02         | 0.00          |
| LW7      | Mean | 5.70 | 29.67               | 0.12              | 281.83      | 1.07         | 169.00        |
|          | SD   | 0.00 | 0.06                | 0.00              | 0.12        | 0.04         | 0.00          |
| LW8      | Mean | 6.16 | 28.70               | 0.12              | 280.73      | 1.36         | 170.30        |
|          | SD   | 0.01 | 0.00                | 0.00              | 0.06        | 0.05         | 0.00          |
| LW9      | Mean | 7.42 | 30.60               | 0.53              | 1206.00     | 1.55         | 708.50        |
|          | SD   | 0.01 | 0.00                | 0.00              | 0.00        | 0.02         | 0.00          |
| LW10     | Mean | 6.11 | 30.90               | 8.31              | 16106.00    | 1.22         | 9397.33       |
|          | SD   | 0.01 | 0.00                | 0.00              | 0.00        | 0.01         | 7.11          |
| LW11     | Mean | 6.48 | 29.80               | 3.08              | 6268.67     | 2.12         | 3731.00       |
|          | SD   | 0.08 | 0.00                | 0.00              | 0.58        | 0.07         | 0.00          |
| LW12     | Mean | 6.81 | 29.30               | 0.06              | 135.87      | 0.86         | 81.25         |
|          | SD   | 0.02 | 0.00                | 0.00              | 0.06        | 0.03         | 0.00          |
| LW13     | Mean | 6.69 | 29.90               | 0.91              | 1985.67     | 1.37         | 1183.00       |
|          | SD   | 0.01 | 0.00                | 0.00              | 0.58        | 0.03         | 0.00          |
| LW14     | Mean | 7.14 | 28.90               | 3.48              | 6888.00     | 0.83         | 4166.50       |
|          | SD   | 0.00 | 0.00                | 0.01              | 1.00        | 0.08         | 6.50          |
| LW15     | Mean | 4.40 | 30.50               | 0.07              | 157.50      | 1.04         | 92.95         |
|          | SD   | 0.00 | 0.00                | 0.00              | 0.00        | 0.01         | 0.00          |

SD, standard deviation.

**Table S2.** Major ions descriptive analysis.

| Stations |      | HCO <sub>3</sub> <sup>-</sup><br>(mg/L) | Cl <sup>-</sup><br>(mg/L) | SO <sub>4</sub> <sup>2-</sup><br>(mg/L) | Ca <sup>2+</sup><br>(mg/L) | Mg <sup>2+</sup><br>(mg/L) | K <sup>+</sup><br>(mg/L) | Na <sup>+</sup><br>(mg/L) |
|----------|------|-----------------------------------------|---------------------------|-----------------------------------------|----------------------------|----------------------------|--------------------------|---------------------------|
| LW1      | Mean | 174.87                                  | 48.98                     | 2.00                                    | 7.41                       | 1.39                       | 4.93                     | 13.23                     |
|          | SD   | 134.03                                  | 12.12                     | 0.00                                    | 8.29                       | 1.14                       | 1.43                     | 8.780                     |
| LW2      | Mean | 55.31                                   | 50.65                     | 27.33                                   | 4.70                       | 1.12                       | 1.98                     | 4.98                      |
|          | SD   | 5.64                                    | 1.16                      | 13.32                                   | 6.58                       | 0.68                       | 2.02                     | 2.50                      |
| LW3      | Mean | 139.08                                  | 31.66                     | 62.67                                   | 6.86                       | 7.27                       | 7.90                     | 18.94                     |
|          | SD   | 4.23                                    | 3.79                      | 50.81                                   | 10.65                      | 3.46                       | 1.98                     | 11.74                     |
| LW4      | Mean | 63.44                                   | 24.66                     | 16.00                                   | 7.59                       | 1.53                       | 4.05                     | 15.30                     |
|          | SD   | 10.64                                   | 4.16                      | 13.23                                   | 8.20                       | 1.19                       | 1.14                     | 7.79                      |
| LW5      | Mean | 11.39                                   | 26.99                     | 1.67                                    | 4.67                       | 1.08                       | 1.87                     | 4.70                      |
|          | SD   | 5.08                                    | 3.00                      | 2.08                                    | 6.61                       | 0.72                       | 1.98                     | 2.05                      |
| LW6      | Mean | 66.69                                   | 37.99                     | 3.00                                    | 7.02                       | 7.33                       | 7.56                     | 19.69                     |
|          | SD   | 3.73                                    | 2.65                      | 0.00                                    | 10.61                      | 3.40                       | 2.15                     | 12.43                     |
| LW7      | Mean | 99.23                                   | 42.66                     | 0.00                                    | 7.81                       | 1.53                       | 3.95                     | 15.49                     |
|          | SD   | 1.41                                    | 3.06                      | 0.00                                    | 8.40                       | 1.19                       | 1.51                     | 8.19                      |
| LW8      | Mean | 50.43                                   | 75.65                     | 92.00                                   | 4.65                       | 1.10                       | 1.89                     | 5.12                      |
|          | SD   | 2.82                                    | 3.22                      | 132.18                                  | 6.42                       | 0.70                       | 2.12                     | 2.62                      |
| LW9      | Mean | 84.59                                   | 142.95                    | 73.00                                   | 6.845                      | 7.35                       | 7.72                     | 19.49                     |
|          | SD   | 3.73                                    | 20.80                     | 100.48                                  | 10.63                      | 3.51                       | 1.88                     | 12.02                     |
| LW10     | Mean | 432.69                                  | 66.98                     | 12.67                                   | 19.51                      | 6.67                       | 13.44                    | 29.12                     |
|          | SD   | 5.08                                    | 22.86                     | 28.11                                   | 26.58                      | 7.83                       | 17.42                    | 26.63                     |
| LW11     | Mean | 248.88                                  | 27.66                     | 0.67                                    | 33.35                      | 18.72                      | 35.13                    | 51.33                     |
|          | SD   | 2.44                                    | 9.29                      | 1.16                                    | 41.34                      | 6.17                       | 6.89                     | 7.90                      |
| LW12     | Mean | 51.24                                   | 33.32                     | 16.00                                   | 20.43                      | 8.56                       | 16.03                    | 31.30                     |
|          | SD   | 4.23                                    | 4.73                      | 20.81                                   | 26.24                      | 7.47                       | 15.69                    | 22.48                     |
| LW13     | Mean | 349.73                                  | 128.29                    | 69.00                                   | 33.99                      | 15.89                      | 35.51                    | 54.00                     |
|          | SD   | 5.64                                    | 11.37                     | 56.31                                   | 42.15                      | 0.89                       | 7.20                     | 3.49                      |
| LW14     | Mean | 953.23                                  | 333.23                    | 129.33                                  | 20.18                      | 8.59                       | 15.90                    | 28.49                     |
|          | SD   | 25.04                                   | 173.85                    | 43.88                                   | 25.72                      | 7.39                       | 15.75                    | 17.73                     |
| LW15     | Mean | 8.13                                    | 47.99                     | 69.00                                   | 33.76                      | 15.99                      | 34.91                    | 54.96                     |
|          | SD   | 1.41                                    | 3.60                      | 56.31                                   | 41.68                      | 1.166                      | 6.861                    | 6.22                      |

SD, standard deviation.

Table S3. Heavy metals descriptive analysis.

| Stations |      | Fe<br>(µg/L) | Mn<br>(µg/L) | As<br>(µg/L) | Cu<br>(µg/L) | Pb<br>(µg/L) | Zn<br>(µg/L) | Ni<br>(µg/L) | Cd<br>(µg/L) | Se<br>(µg/L) | Cr<br>(µg/L) | Hg<br>(µg/L) |
|----------|------|--------------|--------------|--------------|--------------|--------------|--------------|--------------|--------------|--------------|--------------|--------------|
| 1        | Mean | 7.3067       | 0.1660       | 0.0211       | 0.0010       | 0.0029       | 0.0160       | 0.0019       | 0.0002       | 0.0004       | 0.0002       | 0.0163       |
|          | SD   | 0.1686       | 0.0046       | 0.0003       | 0.0003       | 0.0010       | 0.0027       | 0.0000       | 0.0000       | 0.0002       | 0.0000       | 0.0241       |
| 2        | Mean | 0.0593       | 0.0833       | 0.0012       | 0.0017       | 0.0051       | 0.0223       | 0.0041       | 0.0003       | 0.0011       | 0.0062       | 0.0257       |
|          | SD   | 0.0070       | 0.0014       | 0.0005       | 0.0001       | 0.0015       | 0.0060       | 0.0002       | 0.0002       | 0.0005       | 0.0027       | 0.0107       |
| 3        | Mean | 0.0952       | 0.1748       | 0.0002       | 0.0002       | 0.0035       | 0.0133       | 0.0032       | 0.0002       | 0.0005       | 0.0009       | 0.0100       |
|          | SD   | 0.0023       | 0.0024       | 0.0000       | 0.0000       | 0.0004       | 0.0006       | 0.0005       | 0.0000       | 0.0001       | 0.0004       | 0.0045       |
| 4        | Mean | 15.2200      | 0.6423       | 0.0631       | 0.0021       | 0.0060       | 0.0265       | 0.0032       | 0.0002       | 0.0005       | 0.0002       | 0.0021       |
|          | SD   | 0.2193       | 0.0069       | 0.0008       | 0.0010       | 0.0002       | 0.0025       | 0.0002       | 0.0000       | 0.0000       | 0.0000       | 0.0025       |
| 5        | Mean | 0.2788       | 0.1642       | 0.0002       | 0.0074       | 0.0055       | 0.0371       | 0.0067       | 0.0002       | 0.0006       | 0.0002       | 0.0053       |
|          | SD   | 0.0108       | 0.0034       | 0.0000       | 0.0004       | 0.0026       | 0.0041       | 0.0002       | 0.0000       | 0.0002       | 0.0000       | 0.0039       |
| 6        | Mean | 6.6833       | 0.5260       | 0.0499       | 0.0008       | 0.0042       | 0.0140       | 0.0019       | 0.0002       | 0.0005       | 0.0002       | 0.0094       |
|          | SD   | 0.1474       | 0.0036       | 0.0013       | 0.0001       | 0.0013       | 0.0060       | 0.0000       | 0.0001       | 0.0000       | 0.0000       | 0.0038       |
| 7        | Mean | 12.6033      | 0.2725       | 0.0002       | 0.0019       | 0.0046       | 0.0156       | 0.0019       | 0.0002       | 0.0010       | 0.0002       | 0.0029       |
|          | SD   | 0.0709       | 0.0009       | 0.0000       | 0.0006       | 0.0005       | 0.0073       | 0.0000       | 0.0000       | 0.0007       | 0.0000       | 0.0006       |
| 8        | Mean | 2.3867       | 0.0291       | 0.0051       | 0.0011       | 0.0063       | 0.0185       | 0.0019       | 0.0004       | 0.0009       | 0.0002       | 0.0031       |
|          | SD   | 0.0231       | 0.0004       | 0.0002       | 0.0002       | 0.0049       | 0.0112       | 0.0000       | 0.0004       | 0.0005       | 0.0000       | 0.0024       |
| 9        | Mean | 0.0545       | 0.0033       | 0.0002       | 0.0032       | 0.0057       | 0.1001       | 0.0020       | 0.0005       | 0.0009       | 0.0002       | 0.0138       |
|          | SD   | 0.0120       | 0.0004       | 0.0000       | 0.0011       | 0.0016       | 0.0296       | 0.0002       | 0.0003       | 0.0005       | 0.0000       | 0.0073       |
| 10       | Mean | 34.0367      | 2.4617       | 0.0072       | 0.0040       | 0.0040       | 0.0080       | 0.0019       | 0.0002       | 0.0018       | 0.0002       | 0.0271       |
|          | SD   | 0.7149       | 0.0510       | 0.0008       | 0.0005       | 0.0010       | 0.0033       | 0.0000       | 0.0001       | 0.0011       | 0.0000       | 0.0319       |
| 11       | Mean | 1.9033       | 0.3862       | 0.0002       | 0.0028       | 0.0062       | 0.0109       | 0.0023       | 0.0002       | 0.0007       | 0.0002       | 0.0092       |
|          | SD   | 0.0306       | 0.0554       | 0.0000       | 0.0010       | 0.0016       | 0.0022       | 0.0008       | 0.0000       | 0.0002       | 0.0000       | 0.0067       |
| 12       | Mean | 0.2918       | 0.0412       | 0.0013       | 0.0012       | 0.0065       | 0.0205       | 0.0019       | 0.0002       | 0.0008       | 0.0002       | 0.0052       |
|          | SD   | 0.0033       | 0.0053       | 0.0004       | 0.0001       | 0.0015       | 0.0055       | 0.0000       | 0.0000       | 0.0005       | 0.0000       | 0.0038       |
| 13       | Mean | 9.1879       | 0.5882       | 0.0002       | 0.0014       | 0.0053       | 0.0147       | 0.0020       | 0.0003       | 0.0010       | 0.0002       | 0.0107       |
|          | SD   | 0.3757       | 0.0222       | 0.0000       | 0.0001       | 0.0014       | 0.0028       | 0.0002       | 0.0001       | 0.0006       | 0.0000       | 0.0144       |
| 14       | Mean | 0.3536       | 0.1130       | 0.0004       | 0.0023       | 0.0014       | 0.0009       | 0.0019       | 0.0002       | 0.0012       | 0.0003       | 0.0039       |
|          | SD   | 0.0073       | 0.0079       | 0.0003       | 0.0002       | 0.0003       | 0.0004       | 0.0000       | 0.0000       | 0.0004       | 0.0001       | 0.0026       |
| 15       | Mean | 0.0667       | 0.0204       | 0.0002       | 0.0021       | 0.0089       | 0.0263       | 0.0019       | 0.0003       | 0.0005       | 0.0002       | 0.0006       |
|          | SD   | 0.0057       | 0.0005       | 0.0000       | 0.0002       | 0.0031       | 0.0028       | 0.0000       | 0.0001       | 0.0000       | 0.0000       | 0.0003       |

SD, standard deviation.

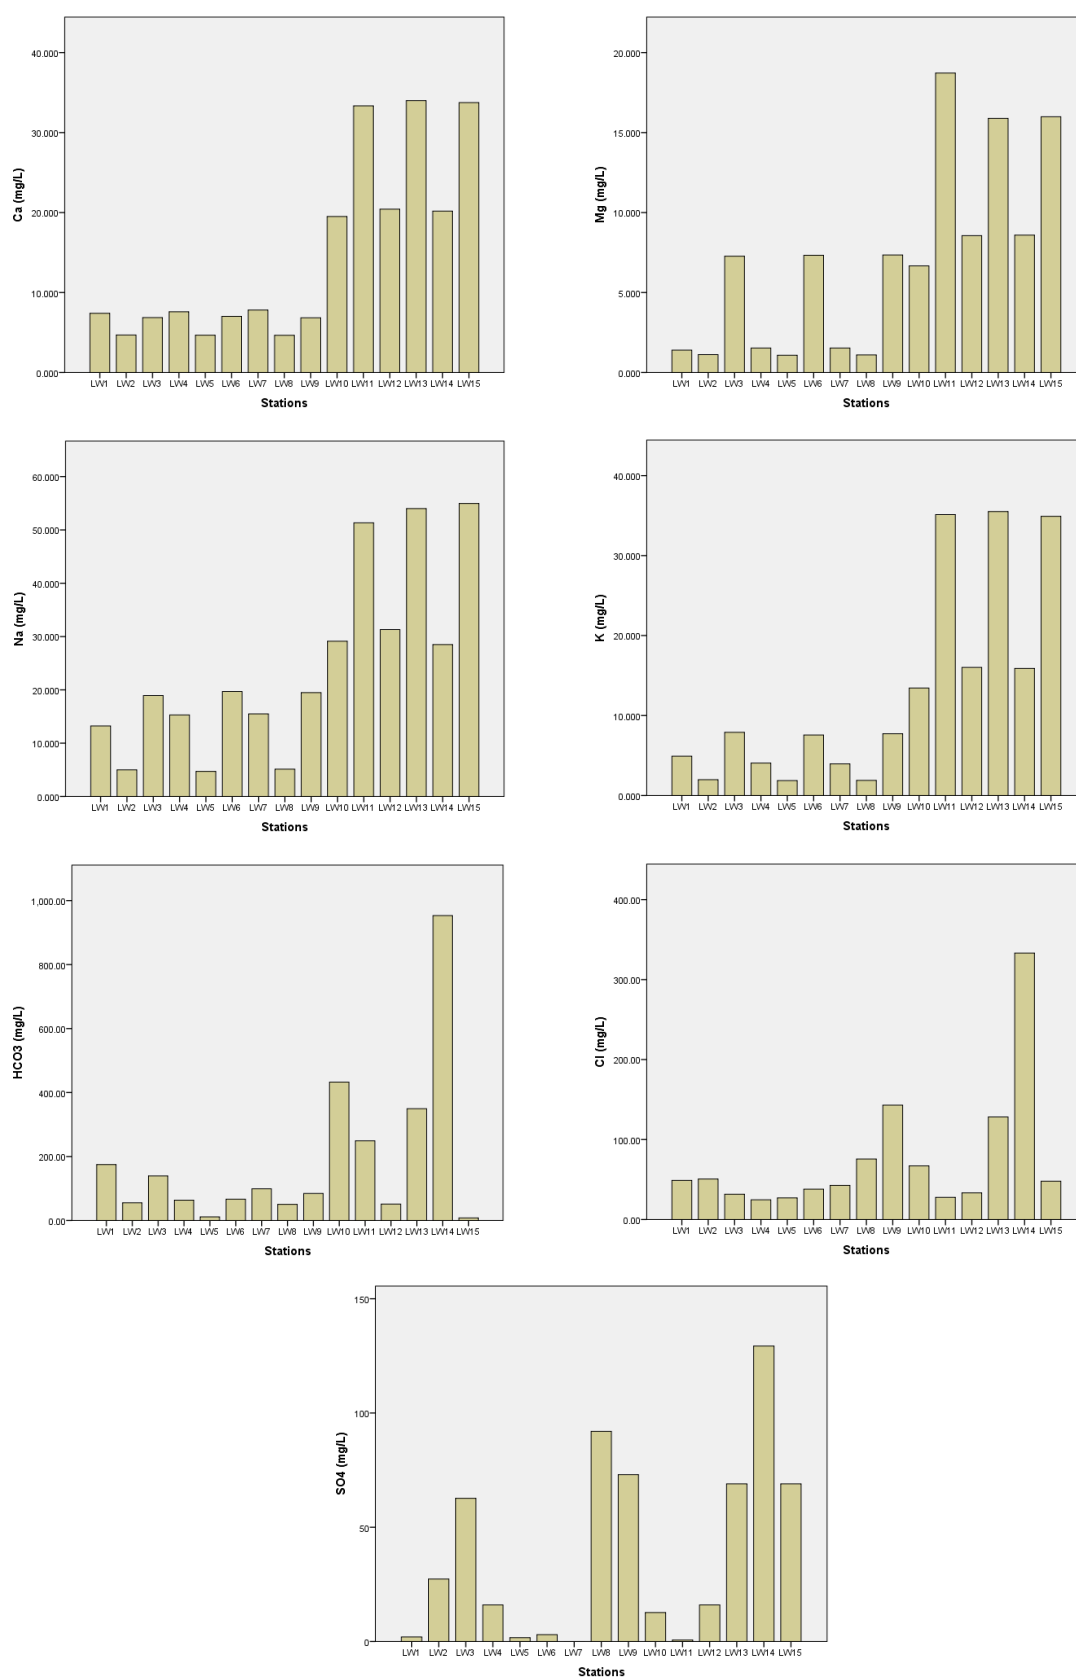

**Figure S1.** Major ions concentration distribution along with sampling station.
